# Supplementary material for: Characterization and application of artificial light sources for nighttime aerosol optical depth retrievals using the Visible Infrared Imager Radiometer Suite Day/Night Band
Source: Copernicus journal article supplement (doi:10.5194/amt-12-3209-2019), 2019-06-17
Supplement: Supplementary file 1 [file amt-12-3209-2019-supplement.zip]

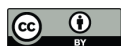

## *Supplement of*

# **Characterization and application of artificial light sources for nighttime aerosol optical depth retrievals using the Visible Infrared Imager Radiometer Suite Day/Night Band**

**Jianglong Zhang et al.**

*Correspondence to:* Jianglong Zhang (jzhang@atmos.und.edu)

- amt-12-3209-2019-supplement-title-page.pdf
- citylist\_200\_nostate\_sorted
- citylist\_IN\_nostate\_sorted
- citylist\_ME\_nostate\_sorted

The copyright of individual parts of the supplement might differ from the CC BY 4.0 License.
